J, Bäcklund M, Silvasti P, Nukarinen E, Tiainen M, Saraste A, Pietilä M, Airaksinen J, Valanne L, Martola J, Silvennoinen H, Scheinin H, Harjola VP, Niiranen J, Korpi K, Varpula M, Inkinen O, Olkkola KT, Maze M, Vahlberg T, Laitio T: Effect of inhaled xenon on cerebral white matter damage in comatose survivors of out-of-hospital cardiac arrest: A randomized clinical trial. *JAMA* 2016; 315:1120–8

28. Azzopardi D, Robertson NJ, Bainbridge A, Cady E, Charles-Edwards G, Deierl A, Fagiolo G, Franks NP, Griffiths J, Hajnal J, Juszcak E, Kapetanakis B, Linsell L, Maze M, Omar O, Strohm B, Tusor N, Edwards AD: Moderate hypothermia within 6h of birth plus inhaled xenon *versus* moderate hypothermia alone after birth asphyxia (TOBY-Xe): A proof-of-concept, open-label, randomised controlled trial. *Lancet Neurol* 2016; 15:145–53

## ANESTHESIOLOGY REFLECTIONS FROM THE WOOD LIBRARY-MUSEUM

### From Chloroform to Melpomene, Liebig's Muse of Tragedy

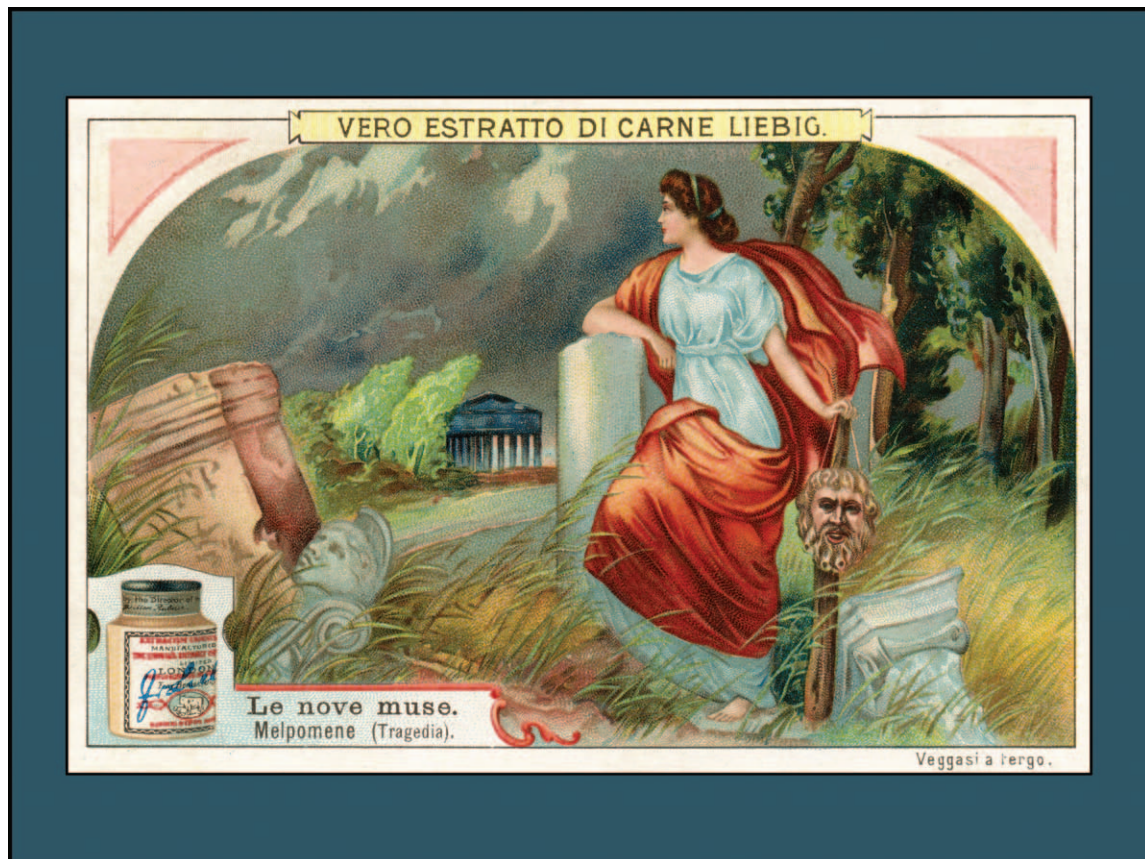

Rather than with her sister Thalia's mask of comedy, the Muse Melpomene ("songstress") is associated with the mask of tragedy, affixed here (*low right*) to her iconic Club of Heracles (Hercules). In her role as the Muse of Tragedy, perhaps Melpomene has wrought havoc with her Herculanean Club, as depicted here on an Italian card advertising a company named after chloroform pioneer Justus von Liebig (1803 to 1873). Before the famous Library of Alexandria met its tragic end, the word *mouseion* ("shrine or seat of the Muses") was redefined as a place of study and eventually resurfaced in the English language as the word "museum." (Copyright © the American Society of Anesthesiologists' Wood Library-Museum of Anesthesiology.)

George S. Bause, M.D., M.P.H., Honorary Curator, ASA's Wood Library-Museum of Anesthesiology, Schaumburg, Illinois, and Clinical Associate Professor, Case Western Reserve University, Cleveland, Ohio. UJYC@aol.com.
